# Supplementary material for: Identification and functional analysis of the geranylgeranyl pyrophosphate synthase gene (crtE) and phytoene synthase gene (crtB) for carotenoid biosynthesis in Euglena gracilis
Source: PubMed Central journal article supplement (PMC4702402; doi:10.1186/s12870-015-0698-8), 2016-01-05
Supplement: 12870_2015_698_MOESM1_ESM.pdf [file 12870_2015_698_MOESM1_ESM.pdf]

TTTCGCTCACACGCACAATGGACCCCGCCGCTGCCATACTCGCTGACGTGCAGCCCGCCGCGC  
M A P A C P Y F T A D V O P A  
CATACCTGAACCTGGTCTGCGGCGCCGACCAAGGCGATGGGGGTAGCCCTCATCTGGCGT  
P Y L N W S A A P T K A M G V A L I L A  
CGCTGGCAGTGGGCTGTCTCCTTGGCAGTGCAGGCCAGGGCAGCTGGCTGTTTGTCTGTTG  
S L A V G C L L G S A G O G S W L F A V  
GCCATCGGCCGGTGGTGGCTGGCCGGCCTACCCCGATGGTGGTGCGCAGTAACCCCGTGG  
G H R P V V A G R P T P M V V R S N P V  
CATCCGCTCCCGGCCATCATCCAGTTGTACCACGGCTGAGGAGGCGTTGAGGTCCA  
A S A S R P I I O L Y P R R E E A L R S  
CGCTTGTGCAAATGAGCCTGTGGCGGCAGACTTCAACCTTGGCAAGTACATCATGGCCA  
T L V A N E P V A A D F N L G K Y I M A  
AGGCAGCGGGCGGTGGAGGCGCGCTGGACAAGTACGTCCCAGACGGGCTACCCCCACACC  
K A A A V E A A L D K Y V P N G L P P H  
CGAAGGTCACTTTGATGCGATGAGACACTCCCTCCTGGCCGGTGGCAAGAGGATCCGGC  
P K V I F D A M R H S L L A G G K R I R  
CGGCCTGGTCACTCGCGCGTGCAGATGGTGGCGGCACTCAGGAGATGGCGATGCCCA  
P A L V I A A C E M V G G G T O E M A M P  
CCGCTGTGCCCTGGAGATGGTCCACACCATGTCCCTCATCCACGACGACCTCCCCGTGA  
T A C A L E M V H T M S L I H D D L P V  
TGGACAACGACGACTTCAGGCGGGGGAAGCCAACCTGCCACAAGGTGTATGGGGAGGGCA  
M D N D D F R R G K P T C H K V Y G E A  
TCGCCCTGCTGGCCGGGGATGCGCTGCTCGCGGAGTCTGTTCTCGTGTATTGCGAAGGAGA  
I A L L A G D A L L A E S F S L I A K E  
CGAAGGGGGTCCCAGCGGACCGGTGTTGAAGTCCATCGCCAACCTGGGCACCTTGGTGG  
T C K G V P A A D R V L K S I A N L G T L V  
GCTCCGAGGGATTGGTGGCGGGCAGGTGATGGACATGGCGTACGAGGGGAAGGGCGACA  
G S E G L V G G O V M D M A Y E G K G D  
CCGCCACACTGGAAGCAGTCGAGTACATCCACATCCACAAGACGGCGGCACTGCTGGAGG  
T A T L E A V E Y I H I H K T A A L L E  
CCGCGTGTGGAACGGCGCTGTATCGGCGGGCGCTCGKACCAGGAGCTGGAGLTGCTGC  
A A V W N G A C I G G A S D O E L E V L  
GCCGGTTCGCCAGAAGATCGGTCTGGCGTTCCAAATCATCGACGACGTGCTGGACGCCA  
R R F A A O K I G L A F Q I I D D V L L D A  
CCATGACTGGGGAGCAGCTGGGCAAGACAGCGGTAAGGATGAGGCGTGGCCAAAGGCCA  
T M T G E O L G K T A G K D E A V A K A  
CGTACGTGCGGGTGGTTCGGCCTGGAGCAGTCCCGGCCATCGCCAGCGGCTCATCGCGG  
T Y V R V V G L E Q S R A I A Q R L I A  
AGGCAGAGGGACCTCGCCCCCTACGGCGCAAGGCGGTCCCCCTGCTGGCCCTCGCCG  
E A K A D L A P Y G A K A V P L L A L A  
ACTTCATCACCGCCCGCACCAACTGAGGCTGCCGTGCTGCCCGGGCTAACCTACCG  
D F I T A R T N  
CCTCCCAACCAGTCCCCCCCCCACTGCAGAGTCGCTAGGCCCGAGCTACGTCCCAGC  
CCACCCATTTGCCGGTCTGCCTGGCACCTTGGGTGGCGCGGCGGGGCTTGACGGGTGTC  
GGCCGGTCCCCTGGTAGACCCGTCCCCGGCCTCGGTAGCTTTTCTGTACGCTGGG
