# Supplementary material for: Identification and functional analysis of the geranylgeranyl pyrophosphate synthase gene (crtE) and phytoene synthase gene (crtB) for carotenoid biosynthesis in Euglena gracilis
Source: PubMed Central journal article supplement (PMC4702402; doi:10.1186/s12870-015-0698-8), 2016-01-05
Supplement: 12870_2015_698_MOESM2_ESM.pdf [file 12870_2015_698_MOESM2_ESM.pdf]

TTCCGGTCGCTCCCCTTCCACATGTCGCGCCAGAGGCATCGGCTGGCCTCCCGGCAGCCCC  
M S G O R H R L A S R O P  
TCTATTGCGGTGGCGCTGACCGCCCCGGGACCCCCGGGCCACGCTGGCAAGGTGTCCA  
L Y C G G G A D R P R D P P G H A G K V S  
AGGTCTGGCGACCACCGCCCTCTACTGGTCTGTGCCACCTCCAGTGGCGGCTTCCACC  
K V L A T T A L L L V C A T S S A A F H  
GCATGGCAGCCTCATCCTGGTTTGCTCGCGTTCAGCCGGCCTCAAACGTGGTCCCTACAA  
R M A A S S W F A R V Q P A S N V V P T  
GCGCAACATGGACCCCGGCTCCCACTGGCCTGCGGGCCATCCATGTGGACAATATGG  
S A T W T P R L P T G L R A I H V D N M  
AGTCGCCGGGGCTACCATCCGTGGCGCTGGAGACGAAGACCTTCAATGCACAGGCCGTGG  
E S P G L P S V A R L E T K T F N A Q A V  
AGGAGCCCTATAATGAGSCTGAGAAGATTATGGCCACTATGCCAAAACATTCTATCTGG  
E E A Y N E V E K I M A H Y A K T F Y L  
GCTCCAAGTTCTTCCCCCTGAAGAAGCGAAAGCCATCTGGGCAGTGTACGTGTGGTGCC  
G S K F F P L K K R K A I W A V Y V W C  
GTCGCACGGATGAGATTGTGGACGGGCCACCGTGTCAAAGATCCGACCAAGCTGCTGG  
R R T D E I V D G P T V S K D P T K L L  
CGGACCTGCGGGAGTGGGAGCAGCGCCTCGACCTGATGTTTCGATGGGAAGGCGGTGGACG  
A D L R E E W E O R L D L M F D G K A A V D  
CGTGGACTACGCCCTGGCCGAGTCTGTGAAGTCTTCCGGGGAAGAAGCAGCGTACT  
A L D Y A L A E S L K V F P G K K Q P Y  
ACGACATGATCGAGGGCATGCGGATGGACCTGCCCGTTGTGGGGCAGCAGCGGTACCAA  
Y D M I E G M R M D L P V V G Q Q R Y Q  
CCTGGACGACCTGTACCTGTACTGCTACCGGGTGGCGTCCACCGTGGGGCTAATGACGC  
T W D D L Y L Y C Y R V A S T V G L M T  
TGCCGGTGTATGGGGCTCACGCCGGGCTACACCTTCGAGCAGGCGGAGCCGCCCGCGGTGG  
L P V M G G L T P G Y T F E Q A E P P A V  
CCCTGGGCATCGCCCTGCAGATCACCAACCTCTGCGCAGTCTGGGGAGGACTACCGAG  
A L G I A L Q I T N I L R D V G E D Y R  
ATCGTGGCCGGATCTACCTGCCCTTGAGGACATGGCTCGGTTCCGGAGTGACGGAGGATC  
D R G R I Y L P L E D M A R F G V T E D  
AGATCCAAGCAGAAATCGTGGATGAGAATTACGGGCTTGATGCGATTGAAATTC AAC  
Q I Q A E I V D E N Y R A L M R F E I Q  
GTGCCCGAGACTACTATGCACTGGCCAAAACAGGGATCCCGATGCTGGCTCCGGAGGCC  
R A R D Y Y A L A K T T G I P M L A P E A  
GGATGCCGGTGCAGTCTGCTGGACCTCTACAGCCAGATCCCTGGACTCCATCGAGCGGA  
R M P V O S S L D L Y S O I L D S I E R  
ACGACTACGACAACTTCCGCCAGCGGGCCTACGTCTCCAACCTGGAACAAGCTGGTCAACC  
N D Y D N F R Q R A Y V S N W N K L V T  
TCCCCTCTCTGGCTCCGTACTCTGGGCTTGAAGATCTGATGCGGGCCCGAGGCAGCCC  
L P L S W L R T W G L K I  
AAAGATGGAGAGCCGCAAGGAACGGTGTTCAGTTTGCCCCCTGCCGTTTCGTATCATACT  
CGGCTGCT
