# Supplementary material for: Identification and functional analysis of the geranylgeranyl pyrophosphate synthase gene (crtE) and phytoene synthase gene (crtB) for carotenoid biosynthesis in Euglena gracilis
Source: PubMed Central journal article supplement (PMC4702402; doi:10.1186/s12870-015-0698-8), 2016-01-05

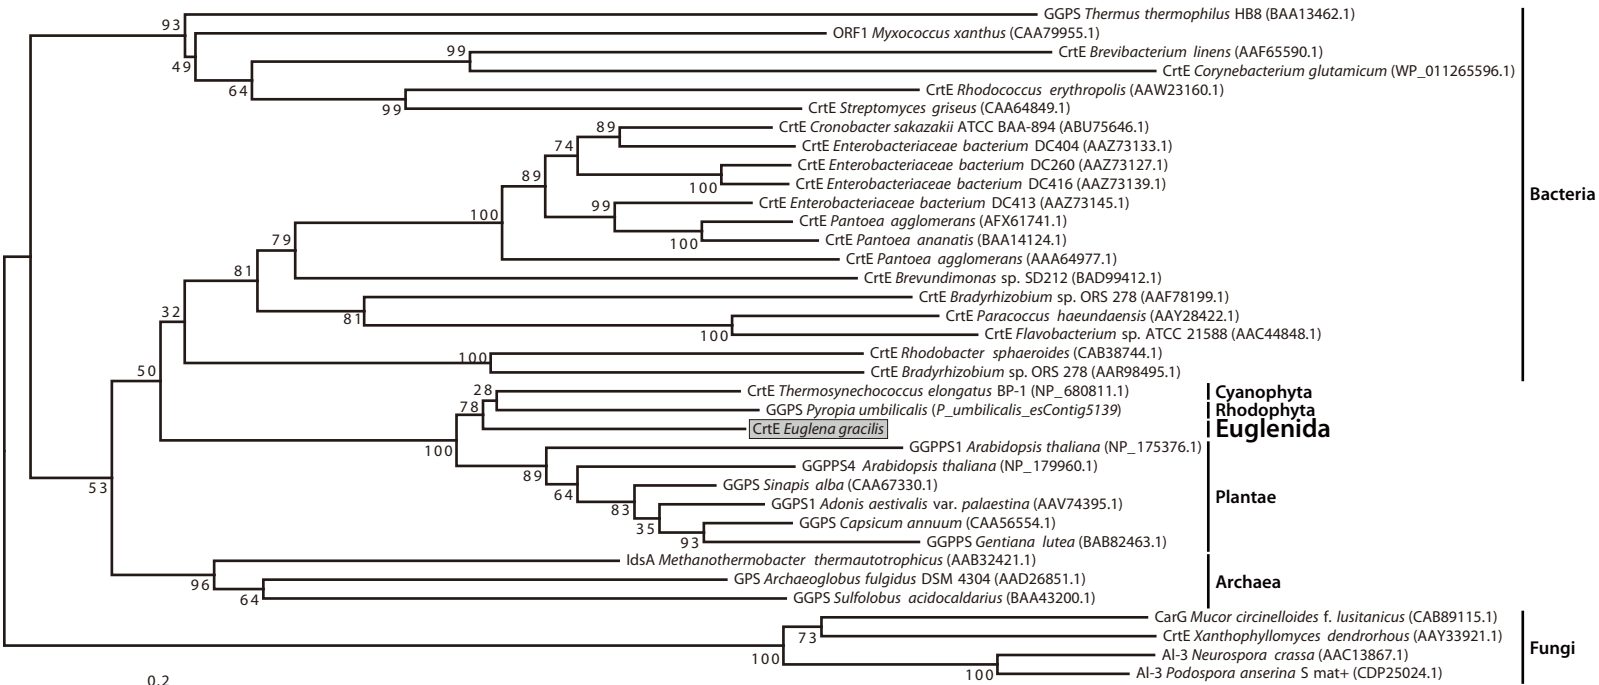

Supplement: 12870_2015_698_MOESM3_ESM.pdf [file 12870_2015_698_MOESM3_ESM.pdf]
